# Supplementary material
Source: Elsevier journal article supplement (https://www.sciencedirect.com/science/article/pii/S169726002100003X)
Supplement: mmc1 [file S169726002100003X:mmc1.docx]

**Appendix A** Spanish short version of Negative Attitudes Toward Masturbation Inventory (NATMI).

A continuación, se le presentan diez afirmaciones que muestran diversas opiniones y actitudes sobre la masturbación en solitario. Le pedimos que indique en qué medida son verdaderas o falsas para usted.

Para responder, debe utilizar la escala numérica que aparece al lado de cada frase.

Por favor, recuerde lo que significa cada número de la escala de respuesta que aparece justo a continuación.

1 = Totalmente falso

2 = Bastante falso

3 = Indecisión

4 = Bastante verdadero

5 = Totalmente verdadero

| 1 | Masturbation is a sin against yourself (*La masturbación es un signo de debilidad o un pecado contra uno/a mismo/a*) | 1 | 2 | 3 | 4 | 5 |
| --- | --- | --- | --- | --- | --- | --- |
| **2** | Masturbation is an adult is juvenile and immature (*La masturbación en adultos es una conducta infantil e inmadura*) | 1 | 2 | 3 | 4 | 5 |
| 3 | Masturbation can lead to homosexuality (*La práctica de la masturbación puede conducir a la homosexualidad*) | 1 | 2 | 3 | 4 | 5 |
| 4 | After masturbating, a person feels degraded (*Tras masturbarse, las personas deberían sentir vergüenza*) | 1 | 2 | 3 | 4 | 5 |
| 5 | I feel guilty about masturbating (*Cuando me masturbo me siento culpable*) | 1 | 2 | 3 | 4 | 5 |
| 6 | Playing with your own genitals is disgusting (*Jugar con los propios genitales es asqueroso*) | 1 | 2 | 3 | 4 | 5 |
| 7 | Any masturbation is too much (*La masturbación es una conducta que está de más*) | 1 | 2 | 3 | 4 | 5 |
| 8 | When I masturbate, I am disgusted with myself (*Cuando me masturbo, me doy asco*) | 1 | 2 | 3 | 4 | 5 |
| 9 | Masturbation is a normal sexual outlet (*La masturbación es una conducta sexual normal*) | 1 | 2 | 3 | 4 | 5 |
| 10 | After I masturbate, I am disgusted with myself for losing control of my body (*Después de masturbarme, me enfado conmigo mismo/a por haber perdido el control sobre mi propio cuerpo*) | 1 | 2 | 3 | 4 | 5 |

*Note*. Item 9 is reverse.
